# Supplementary material for: Sedimentary ancient DNA and pollen reveal the composition of plant organic matter in Late Quaternary permafrost sediments of the Buor Khaya Peninsula (north-eastern Siberia)
Source: Copernicus journal article supplement (doi:10.5194/bg-2016-386), 2016-09-27
Supplement: Supplementary file 1 [file bg-2016-386-supplement.zip]

Archive with 5 entries (5 files):
- S4_DNA_dataset.xlsx
- S5_cultivated_nonArctic_plants.xlsx
- S6_negative_controls.xlsx
- S7_Pollen_counts.xlsx
- Supplement_Zimmermann.pdf
