# Supplementary material for: Sedimentary ancient DNA and pollen reveal the composition of plant organic matter in Late Quaternary permafrost sediments of the Buor Khaya Peninsula (north-eastern Siberia)
Source: Copernicus journal article supplement (doi:10.5194/bg-2016-386), 2016-09-27
Supplement: Supplementary file 1 [file bg-2016-386-supplement.zip › S5_cultivated_nonArctic_plants.xlsx]

## Sheet: Tabelle1
S3: List of sequences with best identity = 1.0 assigned to cultivated plant taxa or non-Arctic taxa or which are probable contamination.
final name	sequence	comment	counts	scientific_name_by_db.gh_embl117	scientific_name_by_db.arctborbryo_gh	taxid_by_db.gh_embl117	species_list.gh_embl117.good	taxid_by_db.arctborbryo_gh	species_list.arctborbryo_gh	best_identity.gh_embl117.good	best_identity.arctborbryo_gh	family_name	sample.EH111_trnL_g_h	sample.EH119_trnL_g_h	sample.EH121_trnL_g_h	sample.EH112_trnL_g_h	sample.EH113_trnL_g_h	sample.EH114_trnL_g_h	sample.EH115_trnL_g_h	sample.EH116_trnL_g_h	sample.EH117_trnL_g_h	sample.EH118_trnL_g_h	sample.EH133_trnL_g_h	sample.EH120_trnL_g_h	sample.EH123_trnL_g_h	sample.EH124_trnL_g_h	sample.EH125_trnL_g_h	sample.EH126_trnL_g_h	sample.EH127_trnL_g_h	sample.EH128_trnL_g_h	sample.EH129_trnL_g_h	sample.EH130_trnL_g_h	sample.EH131_trnL_g_h	sample.EH132_trnL_g_h	sample.EH135_trnL_g_h	sample.EH136_trnL_g_h	sample.EH137_trnL_g_h	sample.EH138_trnL_g_h	sample.EH139_trnL_g_h	sample.EH140_trnL_g_h	sample.EH141_trnL_g_h	sample.EH142_trnL_g_h	sample.EH143_trnL_g_h	sample.EH144_trnL_g_h	sample.EH145_trnL_g_h	sample.EH147_trnL_g_h	sample.EH148_trnL_g_h	sample.EH149_trnL_g_h	sample.EH150_trnL_g_h
Acacia	atcctgttttccgaaaaccaaaagaagagttcagaaagggagaataaaataaaaaaaag	cultivated plant	61574	Acacia auriculiformis	Magnoliophyta	205027	[Acacia auriculiformis]	3398	[]	1	0.836066	Fabaceae	0	0	0	0	0	0	0	0	0	0	0	0	0	0	0	0	0	0	0	0	0	0	0	0	0	0	0	0	0	0	0	0	0	0	0	0	0
Allium sativum	atctttattttttgaaaaacaaggttttaaaaaatagaataaaaagg	cultivated plant	17	Allium sativum	Allium	4682	[Allium sativum]	4678	[Allium schoenoprasum, Allium angulosum]	1	0.93617	Amaryllidaceae	0	0	0	0	0	0	0	0	0	17	0	0	0	0	0	0	0	0	0	0	0	0	0	0	0	0	0	0	0	0	0	0	0	0	0	0	0
Anacardium	atcctattttacgagaacaaaaacaaacagggggtcagaacgggagaaaaaaaag	cultivated plant	146	Anacardium occidentale	eudicotyledons	171929	[Anacardium occidentale]	71240	[]	1	0.821429	Anacardiaceae	0	0	0	0	0	0	0	0	0	0	0	0	0	0	0	0	0	0	0	0	0	0	0	0	146	0	0	0	0	0	0	0	0	0	0	0	0
Apiaceae MOTU3	atcctattttccaaaaacaaacaaaggcccagaaggtgaaaaagg	cultivated plant; identical with Coriandrum sativum	7344	Apioideae	Apiaceae	241778	[]	4037	[]	1	0.977778	Apiaceae	0	0	0	0	2464	0	0	0	0	0	0	0	0	0	4880	0	0	0	0	0	0	0	0	0	0	0	0	0	0	0	0	0	0	0	0	0	0
Arabidopsis GROUP 1	atcctggtttacgcgaacaaaccggagtttacaaagcgcgaaaaaagg	cultivated plant	30903	Brassicaceae	Arabidopsis	3700	[]	3701	[Arabidopsis arenosa, Arabidopsis arenicola, Arabidopsis thaliana, Arabidopsis lyrata]	1	1	Brassicaceae	0	0	0	0	30903	0	0	0	0	0	0	0	0	0	0	0	0	0	0	0	0	0	0	0	0	0	0	0	0	0	0	0	0	0	0	0	0
Avena	atccgtgttttgagaaaacaagagggttctcgaactagaatacaaaggaaaag	cultivated plant	880	Avena	Pooideae	4496	[]	147368	[]	1	0.981132	Poaceae	0	0	0	0	19	15	37	0	0	0	73	474	15	56	0	12	15	0	0	0	0	10	0	28	14	19	11	0	0	0	0	0	0	28	0	11	20
Aveninae Group 1	atccgtgttttgagaaaaccaggaggttctcgaactagaatacaaaggaaaag	cultivated plant	5627	Poaceae	Magnoliophyta	4479	[]	3398	[Koeleria asiatica, Trisetum subalpestre, Koeleria macrantha, Koeleria pyramidata, Trisetum spicatum, Sphenopholis intermedia, Trisetum melicoides, Thesium spicatum, Koeleria glauca]	1	1	Poaceae	0	0	0	0	0	0	0	0	0	0	0	0	0	0	0	2936	321	0	26	0	72	0	0	0	0	0	0	280	0	153	86	40	0	477	263	328	257
Brassicaceae	atcctgggttacgcgaacaaaccagagtttagaaagcgg	cultivated plant; identical with Brassica napus	233	Brassicaceae	Cakile	3700	[]	220482	[Cakile maritima, Cakile edentula]	1	1	Brassicaceae	0	0	0	0	0	0	0	0	0	13	0	0	220	0	0	0	0	0	0	0	0	0	0	0	0	0	0	0	0	0	0	0	0	0	0	0	0
Brassicaceae	atcctgggttacgcaaacaaaccagagtttagaaagcgg	cultivated plant; identical with Brassica napus	147	Brassicaceae	Cakile	3700	[]	220482	[Cakile maritima, Cakile edentula]	1	0.974359	Brassicaceae	0	0	0	0	0	0	0	0	0	0	0	0	0	0	0	0	0	0	0	0	0	0	0	0	0	0	0	0	0	147	0	0	0	0	0	0	0
Briza itatiaiae	atccgtgttttgagaaaataaaggggttctcgaatcgaactagaatacaaaggaaaag	not Arctic	62	Briza itatiaiae	Poales	511979	[Briza itatiaiae]	38820	[]	1	0.982759	Poaceae	31	0	0	0	0	0	0	0	31	0	0	0	0	0	0	0	0	0	0	0	0	0	0	0	0	0	0	0	0	0	0	0	0	0	0	0	0
Capsicum	atcctattttctgaaaacaaataaaggttcagaaaaaaag	cultivated plant	45	Capsicum	eudicotyledons	4071	[]	71240	[]	1	0.822222	Solanaceae	0	45	0	0	0	0	0	0	0	0	0	0	0	0	0	0	0	0	0	0	0	0	0	0	0	0	0	0	0	0	0	0	0	0	0	0	0
Cucurbitaceae	atcctttttccgaaaaaaaaaaagg	cultivated plant	17	Cucurbitaceae	Saxifragaceae	3650	[]	3792	[Micranthes nelsoniana, Micranthes reflexa, Saxifraga porsildiana, Micranthes calycina]	1	0.884615	Cucurbitaceae	0	0	0	0	0	0	0	0	0	0	0	0	0	0	0	0	0	0	0	0	0	0	0	0	0	0	0	0	0	17	0	0	0	0	0	0	0
Cucurbitaceae	atcctttttccgaaaaaaaaaagg	cultivated plant	11	Cucurbitaceae	Magnoliophyta	3650	[]	3398	[Saxifraga porsildiana, Micranthes calycina, Saxifraga tenuis, Micranthes hieraciifolia, Lemna trisulca, Micranthes reflexa, Micranthes nelsoniana, Micranthes foliolosa]	1	0.846154	Cucurbitaceae	0	0	0	0	0	0	0	0	0	0	0	0	0	0	0	0	0	0	0	0	0	0	0	0	0	0	0	0	0	11	0	0	0	0	0	0	0
Glycine max	atcctgttttccgaaaacaaagaaaagttcataaagtgataataaaaaagg	cultivated plant	1063	Glycine	Magnoliophyta	3846	[]	3398	[]	1	0.901961	Fabaceae	0	0	515	0	0	0	0	0	0	548	0	0	0	0	0	0	0	0	0	0	0	0	0	0	0	0	0	0	0	0	0	0	0	0	0	0	0
Hevea brasiliensis	atcctgttttccgaaaacaaacaaagtaaagacagaataaaaaaaaagggggg	cultivated plant	61	Hevea brasiliensis	Magnoliophyta	3981	[Hevea brasiliensis]	3398	[]	1	0.785714	Euphorbiaceae	0	0	0	0	0	0	0	0	0	0	0	61	0	0	0	0	0	0	0	0	0	0	0	0	0	0	0	0	0	0	0	0	0	0	0	0	0
Hordeum GROUP 10	atccgtgttttgagaagggattctcgaactagaatacaaaagaaaag	cultivated plant	12	Hordeum	Hordeum	4512	[]	4512	[Hordeum brevisubulatum, Hordeum jubatum]	1	0.978723	Poaceae	0	0	0	0	0	0	0	0	0	0	0	0	0	0	0	0	0	0	0	0	0	0	0	0	0	0	0	0	0	0	0	0	0	0	12	0	0
Hordeum GROUP 9, Triticeae GROUP 5, GROUP 2	atccgtgttttgagaagggattctcgaactagaatacaaaggaaaag	cultivated plant	1345	Triticeae	Hordeum	147389	[]	4512	[Hordeum brevisubulatum, Hordeum jubatum]	1	1	Poaceae	0	0	0	0	0	0	0	0	0	0	0	0	0	0	0	0	120	94	109	38	227	0	0	0	0	17	201	0	0	0	0	0	0	147	305	0	0
Lactuca sativa	atcacgttttccgaaaacaaacaacggttcagaaagcgaaaatcaaaaag	cultivated plant	527	Lactuca sativa	Asteraceae	4236	[Lactuca sativa]	4210	[]	1	0.98	Asteraceae	0	0	0	0	0	0	0	0	0	0	0	0	0	0	0	0	0	0	0	0	0	0	0	360	0	0	0	0	0	0	0	0	0	0	0	0	0
Lauraceae	atcctgttttcagaaaacaagggttcagaaagcgagaaccaaaaaaag	probable contamination	53	Lauraceae	eudicotyledons	3433	[]	71240	[]	1	0.862745	Lauraceae	0	0	0	16	37	0	0	0	0	0	0	0	0	0	0	0	0	0	0	0	0	0	0	0	0	0	0	0	0	0	0	0	0	0	0	0	0
Lauraceae	atcctgttttcagaaaacaagggttcagaaagcgagaaccaaaaaaaggatag	probable contamination	32604	Persea	Magnoliophyta	3434	[]	3398	[]	1	0.821429	Lauraceae	0	184	0	1418	29807	0	0	0	667	72	0	62	0	0	0	0	0	0	0	0	0	0	0	0	0	52	0	0	0	0	342	0	0	0	0	0	0
Lens culinaris	atccttctttccgaaaacaaatcaaagttcagaaagtgaaaatcaaaaaag	cultivated plant	169	Lens	Trifolium	3863	[]	3898	[Trifolium pratense, Trifolium medium, Trifolium lupinaster]	1	0.960784	Fabaceae	0	0	0	0	0	0	0	0	0	0	0	0	0	0	0	0	0	169	0	0	0	0	0	0	0	0	0	0	0	0	0	0	0	0	0	0	0
Medicago sativa	atccttctttccgaaaacaaataaataaaagttcagaaagttaaaatcaaaaaag	probable contamination	299	Medicago sativa	Papilionoideae	3879	[Medicago sativa]	3814	[Lathyrus vernus, Vicia americana, Vicia sylvatica, Lathyrus palustris, Caragana jubata, Lathyrus pratensis, Lathyrus japonicus]	1	0.963636	Fabaceae	0	0	0	0	0	0	0	0	0	0	0	0	0	0	0	0	0	0	0	0	0	0	299	0	0	0	0	0	0	0	0	0	0	0	0	0	0
Musaceae	atccttattttgagaaaacaaaggtttataaaactagaatttaaaag	cultivated plant	15499	Musaceae	Typha latifolia	4637	[]	4733	[Typha latifolia]	1	0.897959	Musaceae	0	0	0	1998	6915	0	0	0	0	5795	0	0	0	361	0	0	0	11	0	0	0	389	0	0	0	0	0	0	0	0	0	0	0	0	30	0	0
Oryza sativa	atccatgttttgagaaaacaagcggttctcgaactagaacccaaaggaaaag	cultivated plant	34132	BEP clade	Magnoliophyta	359160	[]	3398	[]	1	0.942308	Poaceae	0	0	0	0	0	0	0	0	0	0	0	0	0	0	0	0	0	0	0	0	0	0	0	0	0	0	0	0	0	0	0	0	0	0	0	0	0
PACMAD clade	atcccttttttgaaaaacaagtggttctcaaactagaacccaaaggaaaag	PACMAD clade; identical with Zea mays	54967	PACMAD clade	Muhlenbergia richardsonis	147370	[]	65983	[Muhlenbergia richardsonis]	1	1	Poaceae	0	0	37	0	0	1344	0	0	0	0	0	0	0	53255	0	112	0	0	0	0	0	0	0	0	0	0	0	0	0	0	171	0	0	0	0	0	0
PACMAD clade	tcccttttttgaaaaacaagtggttctcaaactagaacccaaaggaaaag	PACMAD clade; identical with Zea mays	89	Orcuttia pilosa	PACMAD clade	251268	[Orcuttia pilosa]	147370	[Molinia caerulea, Muhlenbergia glomerata, Muhlenbergia richardsonis]	1	0.980392	Poaceae	0	0	0	0	0	0	0	0	0	0	0	0	0	89	0	0	0	0	0	0	0	0	0	0	0	0	0	0	0	0	0	0	0	0	0	0	0
Picea GROUP 1	atccggttcatggagacaatagtttcttcttttattctcctaagataggaaggg	probable contamination	15	Picea	Picea	3328	[]	3328	[Picea glauca, Picea mariana]	1	1	Pinaceae	0	0	0	0	0	0	0	0	0	0	15	0	0	0	0	0	0	0	0	0	0	0	0	0	0	0	0	0	0	0	0	0	0	0	0	0	0
Pinus	atccggttcatgaagacaatgtttcttctcctaagataggaaggg	probable contamination	191791	Pinus	Pinus	139271	[Pinus resinosa]	3337	[Pinus pumila, Pinus sylvestris]	0.977778	1	Pinaceae	0	0	0	0	0	0	51	0	0	0	0	0	0	101680	0	0	0	0	0	0	0	0	0	2319	0	0	0	0	0	0	0	0	0	0	0	0	0
Poa apiculata	atctgtgttttgagaaaacaagggggttctcgaactagaatacaaaggaaaag	not Arctic	3066	Poa apiculata	Pooideae	568982	[Poa apiculata]	147368	[]	1	0.981132	Poaceae	0	0	0	0	21	12	407	0	0	0	80	19	18	73	0	13	0	0	0	0	0	567	709	959	26	0	0	83	36	0	0	0	0	10	0	33	0
Prunus GROUP 16	atcctgttttattaaaacaaacaagggtttcataaaccgagaataaaaaag	probable contamination	227	Prunus	Prunus	3754	[]	3754	[Prunus pensylvanica, Prunus padus, Prunus virginiana]	1	1	Rosaceae	0	0	0	0	0	0	0	0	0	0	0	0	0	0	0	0	0	0	0	0	0	0	0	0	0	0	0	227	0	0	0	0	0	0	0	0	0
Quercus	atcctattttacgaaaacaaataagggttcagaagaaagcaagaataaaaaaag	probable contamination	93	Quercus	Ranunculaceae	3511	[]	3440	[]	1	0.857143	Fagaceae	0	0	0	0	0	0	0	0	42	0	0	0	0	0	0	0	0	0	0	0	0	0	0	0	0	0	0	51	0	0	0	0	0	0	0	0	0
Quercus	atcctattttacgaaaaacaaataagggttcagaagaaagcaagaataaaaaaag	probable contamination	207	Quercus	eudicotyledons	3511	[]	71240	[]	1	0.842105	Fagaceae	0	0	0	0	0	0	0	0	0	207	0	0	0	0	0	0	0	0	0	0	0	0	0	0	0	0	0	0	0	0	0	0	0	0	0	0	0
Rubus idaeus	atcctgttttatgaaaacaaacaagggtttcagaaagcgagaataaataaag	probable contamination	101	Rubus idaeus	Rubus	32247	[Rubus idaeus]	23216	[Rubus sachalinensis, Rubus idaeus]	1	1	Rosaceae	0	0	0	0	0	0	0	0	0	0	0	0	0	0	0	0	0	34	22	0	0	0	0	0	0	0	0	0	0	0	0	0	0	17	12	0	16
Sambucus cerulea	atcctgttttccgaaaacaaacaaaggttcagaaaacgaaaataaaaaag	cultivated plant	17	Sambucus cerulea	campanulids	57006	[Sambucus cerulea]	91882	[Sambucus sibirica, Sambucus racemosa, Menyanthes trifoliata]	1	0.98	Adoxaceae	0	0	17	0	0	0	0	0	0	0	0	0	0	0	0	0	0	0	0	0	0	0	0	0	0	0	0	0	0	0	0	0	0	0	0	0	0
Solanaceae	atcctgttttctgaaaacaaaccaaggttcagaaaaaaag	cultivated plant	63	Lycopersicon	asterids	49274	[]	71274	[]	1	0.844444	Solanaceae	0	0	0	0	0	0	0	0	0	0	0	0	0	0	0	0	0	63	0	0	0	0	0	0	0	0	0	0	0	0	0	0	0	0	0	0	0
Theaceae	atcctgtttttctaaaacaaacaaagattccgaaagcgaaaataaaaaaag	cultivated plant	126929	Theaceae	Magnoliophyta	27065	[]	3398	[]	1	0.903846	Theaceae	0	0	0	0	0	0	0	0	0	0	0	0	0	126929	0	0	0	0	0	0	0	0	0	0	0	0	0	0	0	0	0	0	0	0	0	0	0
Triticeae	atccgtgttttgagaaaacaaggggttctcgaactagaatacaaaggaaaag	cultivated plant	65890	Pooideae	Triticeae	147368	[]	147389	[]	1	1	Poaceae	0	0	0	0	0	0	0	0	0	0	31	0	0	33	0	0	0	17	0	0	0	0	16	0	0	0	0	0	0	0	0	13	0	11	139	68	260
[truncated: 30 more columns]
