# Supplementary material for: Sedimentary ancient DNA and pollen reveal the composition of plant organic matter in Late Quaternary permafrost sediments of the Buor Khaya Peninsula (north-eastern Siberia)
Source: Copernicus journal article supplement (doi:10.5194/bg-2016-386), 2016-09-27
Supplement: Supplementary file 1 [file bg-2016-386-supplement.zip › S6_negative_controls.xlsx]

## Sheet: NTC_BLANK
Table S1: All sequences found in extraction blanks and no template controls (NTC). Samples belonging to the same batch are framed.
			scientific name		species list		taxid		best identity
filtered	comment	counts	by_db.gh_embl117	by_db.arctborbryo_gh	gh_embl117	arctborbryo_gh	gh_embl117	arctborbryo_gh	gh_embl117	arctborbryo_gh	count	sample.EH111_trnL_g_h	sample.EH112_trnL_g_h	sample.EH113_trnL_g_h	sample.EH114_trnL_g_h	sample.EH115_trnL_g_h	sample.EH116_trnL_g_h	sample.EH117_trnL_g_h	sample.EH118_trnL_g_h	sample.EH119_trnL_g_h	sample.EH120_trnL_g_h	sample.EH121_trnL_g_h	BLANK.EH122_trnL_g_h	sample.EH123_trnL_g_h	sample.EH124_trnL_g_h	sample.EH125_trnL_g_h	sample.EH126_trnL_g_h	sample.EH127_trnL_g_h	sample.EH128_trnL_g_h	sample.EH129_trnL_g_h	sample.EH130_trnL_g_h	sample.EH131_trnL_g_h	sample.EH132_trnL_g_h	sample.EH133_trnL_g_h	BLANK.EH134_trnL_g_h	sample.EH135_trnL_g_h	sample.EH136_trnL_g_h	sample.EH137_trnL_g_h	sample.EH138_trnL_g_h	sample.EH139_trnL_g_h	sample.EH140_trnL_g_h	sample.EH141_trnL_g_h	sample.EH142_trnL_g_h	sample.EH143_trnL_g_h	sample.EH144_trnL_g_h	sample.EH145_trnL_g_h	BLANK.EH146_trnL_g_h	sample.EH147_trnL_g_h	sample.EH148_trnL_g_h
NTC_EH1_6_trnL_g_h
filtered out because best identity < 1	only in NTC not in samples	2792	Huperzia	Eukaryota	[Huperzia varia]	[]	37428	2759	0.857143	0.538462	2798	0	0	0	0	0	0	0	0	0	0	0	0	0	0	0	0	0	0	0	20	0	0	0	875	0	0	0	0	0	0	0	0	0	0	0	0	0	0
filtered out because best identity < 1	only in NTC not in samples	63	Streptophyta	Eukaryota	[]	[]	35493	2759	0.666667	0.5	64	0	0	0	0	0	0	0	0	0	0	0	0	0	0	0	0	0	0	0	0	0	0	0	17	0	0	0	0	0	0	0	0	0	0	0	0	0	0
filtered out because best identity < 1	only in NTC and BLANK not in samples	3773	Embryophyta	Eukaryota	[]	[]	3193	2759	0.625	0.5	3786	0	0	0	0	0	0	0	0	0	0	0	10	0	0	0	0	0	0	0	19	0	12	0	975	0	0	0	0	0	0	0	0	0	0	0	0	0	0
filtered out because best identity < 1	only in NTC not in samples	1005	Embryophyta	Embryophyta	[]	[]	3193	3193	0.714286	0.5	1005	0	0	0	0	0	0	0	0	0	0	0	0	0	0	0	0	0	0	0	0	0	0	0	0	0	0	0	0	0	0	0	0	0	0	0	0	0	0
filtered out because best identity < 1	only in NTC not in samples	75	Embryophyta	Eukaryota	[Huperzia varia]	[]	3193	2759	0.833333	0.461538	77	0	0	0	0	0	0	0	0	0	0	0	0	0	0	0	0	0	0	0	0	0	0	0	12	0	0	0	0	0	0	0	0	0	0	0	0	0	0
NTC_EH2_4_trnL_g_h
filtered out because best identity < 1	only in NTC not in samples	11	Streptophyta	Eukaryota	[]	[]	35493	2759	0.541667	0.52	11	0	0	0	0	0	0	0	0	0	0	0	0	0	0	0	0	0	0	0	0	0	0	0	0	0	0	0	0	0	0	0	0	0	0	0	0	0	0
filtered out because best identity < 1	only in NTC not in samples	11	Eukaryota	Eukaryota	[]	[]	2759	2759	0.545455	0.52	11	0	0	0	0	0	0	0	0	0	0	0	0	0	0	0	0	0	0	0	0	0	0	0	0	0	0	0	0	0	0	0	0	0	0	0	0	0	0
filtered out because best identity < 1	only in NTC not in samples	45	Magnoliophyta	Embryophyta	[Elythranthera emarginata, Zygophyllum billardierei, Zygophyllum ovatum, Zygophyllum iodocarpum, Bassia scoparia, Cascadia nuttallii, Dresslerella elvallensis, Euphorbia polycephala]	[]	3398	3193	0.592593	0.516129	45	0	0	0	0	0	0	0	0	0	0	0	0	0	0	0	0	0	0	0	0	0	0	0	0	0	0	0	0	0	0	0	0	0	0	0	0	0	0
filtered out because best identity < 1	only in NTC not in samples	3531	Streptophyta	Eukaryota	[]	[]	35493	2759	0.545455	0.5	3531	0	0	0	0	0	0	0	0	0	0	0	0	0	0	0	0	0	0	0	0	0	0	0	0	0	0	0	0	0	0	0	0	0	0	0	0	0	0
filtered out because best identity < 1	in 2 samples and BLANK	3773	Embryophyta	Eukaryota	[]	[]	3193	2759	0.625	0.5	3786	0	0	0	0	0	0	0	0	0	0	0	10	0	0	0	0	0	0	0	19	0	12	0	975	0	0	0	0	0	0	0	0	0	0	0	0	0	0
filtered out because best identity < 1	only in NTC not in samples	11177	Eukaryota	Eukaryota	[]	[]	2759	2759	0.529412	0.5	11177	0	0	0	0	0	0	0	0	0	0	0	0	0	0	0	0	0	0	0	0	0	0	0	0	0	0	0	0	0	0	0	0	0	0	0	0	0	0
filtered out because best identity < 1	only in NTC not in samples	43264	Embryophyta	Embryophyta	[]	[]	3193	3193	0.551724	0.484848	43264	0	0	0	0	0	0	0	0	0	0	0	0	0	0	0	0	0	0	0	0	0	0	0	0	0	0	0	0	0	0	0	0	0	0	0	0	0	0
filtered out because best identity < 1	only in NTC not in samples	18	Streptophyta	Eukaryota	[]	[]	35493	2759	0.56	0.48	18	0	0	0	0	0	0	0	0	0	0	0	0	0	0	0	0	0	0	0	0	0	0	0	0	0	0	0	0	0	0	0	0	0	0	0	0	0	0
filtered out because best identity < 1	only in NTC not in samples	10	Streptophyta	Eukaryota	[]	[]	35493	2759	0.56	0.48	10	0	0	0	0	0	0	0	0	0	0	0	0	0	0	0	0	0	0	0	0	0	0	0	0	0	0	0	0	0	0	0	0	0	0	0	0	0	0
filtered out because best identity < 1	only in NTC not in samples	18	Eukaryota	Eukaryota	[]	[]	2759	2759	0.48	0.473684	20	0	0	0	0	0	0	0	0	0	0	0	0	0	0	0	0	0	0	0	0	0	0	0	0	0	0	0	0	0	0	0	0	0	0	0	0	0	0
filtered out because best identity < 1	only in NTC not in samples	10599	Eukaryota	Eukaryota	[]	[]	2759	2759	0.473684	0.473684	10599	0	0	0	0	0	0	0	0	0	0	0	0	0	0	0	0	0	0	0	0	0	0	0	0	0	0	0	0	0	0	0	0	0	0	0	0	0	0
filtered out because best identity < 1	only in NTC not in samples	23	Eukaryota	Embryophyta	[]	[]	2759	3193	0.52	0.464286	23	0	0	0	0	0	0	0	0	0	0	0	0	0	0	0	0	0	0	0	0	0	0	0	0	0	0	0	0	0	0	0	0	0	0	0	0	0	0
filtered out because best identity < 1	only in NTC not in samples	24	Eukaryota	Eukaryota	[]	[]	2759	2759	0.538462	0.461538	24	0	0	0	0	0	0	0	0	0	0	0	0	0	0	0	0	0	0	0	0	0	0	0	0	0	0	0	0	0	0	0	0	0	0	0	0	0	0
filtered out because best identity < 1	only in NTC not in samples	11	Eukaryota	Eukaryota	[]	[]	2759	2759	0.428571	0.333333	11	0	0	0	0	0	0	0	0	0	0	0	0	0	0	0	0	0	0	0	0	0	0	0	0	0	0	0	0	0	0	0	0	0	0	0	0	0	0
NTC_EH3_7_8_trnL_g_h
not filtered out	less than 10 counts in NTC: putative tag jumps	4495000	Saliceae	Saliceae	[]	[]	238069	238069	1	1	4495028	0	291707	190973	121377	88809	142	49	11826	5593	349	10176	0	35812	10763	143840	128632	71618	109701	111383	34778	154314	3057	18579	0	0	6573	79281	153429	262957	29664	74078	121152	114024	328211	21743	0	117071	47994
not filtered out	less than 10 counts in NTC: putative tag jumps	3042329	Carex aquatilis	Carex aquatilis	[Carex aquatilis]	[Carex aquatilis]	140788	140788	1	1	3042364	10156	0	0	0	0	0	0	0	0	0	0	0	8341	0	3945	0	1016	0	143	3950	53318	2927	0	0	1523	2060	8062	11866	1172751	2235	1658586	15405	0	0	0	0	10	47
not filtered out	less than 10 counts in NTC: putative tag jumps	521989	Eriophorum	Eriophorum	[]	[Eriophorum callitrix, Eriophorum latifolium, Eriophorum angustifolium, Eriophorum brachyantherum, Eriophorum vaginatum]	46326	46326	1	1	522020	8455	0	20	0	49	5707	190	0	246817	0	11182	0	52851	0	0	272	49	0	62	1097	219	12873	1833	0	28547	5831	18436	1205	35729	32513	5884	40901	6730	0	0	0	29	0
filtered out because best identity < 1	less than 10 counts in NTC: putative tag jumps	27	Eriophorum	Eriophorum	[Eriophorum gracile, Eriophorum angustifolium]	[Eriophorum callitrix, Eriophorum latifolium, Eriophorum angustifolium, Eriophorum brachyantherum, Eriophorum vaginatum]	46326	46326	0.987805	0.987805	46	0	0	0	0	0	0	0	0	15	0	0	0	0	0	0	0	0	0	0	0	0	0	0	0	0	0	0	0	0	0	0	11	0	0	0	0	0	0
filtered out because best identity < 1	only in NTC not in samples	19	Stuckenia	Stuckenia	[Stuckenia filiformis, Stuckenia pectinata]	[Stuckenia filiformis, Stuckenia pectinata, Stuckenia vaginata]	246706	246706	0.988372	0.988372	32	0	0	0	0	0	0	0	0	0	0	0	0	0	0	0	0	0	0	0	0	0	0	0	0	0	0	18	0	0	0	0	0	0	0	0	0	0	0
filtered out because best identity < 1	only in NTC not in samples	11	Embryophyta	Embryophyta	[]	[]	3193	3193	0.615385	0.583333	11	0	0	0	0	0	0	0	0	0	0	0	0	0	0	0	0	0	0	0	0	0	0	0	0	0	0	0	0	0	0	0	0	0	0	0	0	0	0
filtered out because best identity < 1	only in NTC not in samples	150	Embryophyta	Eukaryota	[]	[]	3193	2759	0.608696	0.565217	150	0	0	0	0	0	0	0	0	0	0	0	0	0	0	0	0	0	0	0	0	0	0	0	0	0	0	0	0	0	0	0	0	0	0	0	0	0	0
filtered out because best identity < 1	only in NTC not in samples	15	Embryophyta	Euphyllophyta	[]	[]	3193	78536	0.584906	0.563636	15	0	0	0	0	0	0	0	0	0	0	0	0	0	0	0	0	0	0	0	0	0	0	0	0	0	0	0	0	0	0	0	0	0	0	0	0	0	0
filtered out because best identity < 1	only in NTC not in samples	60264	Embryophyta	Embryophyta	[]	[]	3193	3193	0.642857	0.5625	60265	0	0	0	0	0	0	0	0	0	0	0	0	0	0	0	0	0	0	0	0	0	0	0	0	0	0	0	0	0	0	0	0	0	0	0	0	0	0
filtered out because best identity < 1	only in NTC not in samples	14	Streptophyta	Eukaryota	[]	[]	35493	2759	0.6	0.56	14	0	0	0	0	0	0	0	0	0	0	0	0	0	0	0	0	0	0	0	0	0	0	0	0	0	0	0	0	0	0	0	0	0	0	0	0	0	0
filtered out because best identity < 1	only in NTC not in samples	19949	Embryophyta	Eukaryota	[Drepanolejeunea vesiculosa, Allisonia cockaynii, Cuscuta mcvaughii, Frullanoides mexicana]	[]	3193	2759	0.642857	0.538462	19949	0	0	0	0	0	0	0	0	0	0	0	0	0	0	0	0	0	0	0	0	0	0	0	0	0	0	0	0	0	0	0	0	0	0	0	0	0	0
filtered out because best identity < 1	only in NTC not in samples	14	Embryophyta	Embryophyta	[]	[]	3193	3193	0.585366	0.533333	14	0	0	0	0	0	0	0	0	0	0	0	0	0	0	0	0	0	0	0	0	0	0	0	0	0	0	0	0	0	0	0	0	0	0	0	0	0	0
filtered out because best identity < 1	only in NTC not in samples	39	Embryophyta	Embryophyta	[]	[]	3193	3193	0.547619	0.513514	39	0	0	0	0	0	0	0	0	0	0	0	0	0	0	0	0	0	0	0	0	0	0	0	0	0	0	0	0	0	0	0	0	0	0	0	0	0	0
filtered out because best identity < 1	only in NTC not in samples	12	Embryophyta	Tracheophyta	[]	[]	3193	58023	0.565217	0.511111	12	0	0	0	0	0	0	0	0	0	0	0	0	0	0	0	0	0	0	0	0	0	0	0	0	0	0	0	0	0	0	0	0	0	0	0	0	0	0
filtered out because best identity < 1	only in NTC not in samples	13	Euphyllophyta	Embryophyta	[]	[]	78536	3193	0.577778	0.511111	13	0	0	0	0	0	0	0	0	0	0	0	0	0	0	0	0	0	0	0	0	0	0	0	0	0	0	0	0	0	0	0	0	0	0	0	0	0	0
filtered out because best identity < 1	only in NTC not in samples	23	Embryophyta	Embryophyta	[]	[]	3193	3193	0.553191	0.5	23	0	0	0	0	0	0	0	0	0	0	0	0	0	0	0	0	0	0	0	0	0	0	0	0	0	0	0	0	0	0	0	0	0	0	0	0	0	0
filtered out because best identity < 1	only in NTC not in samples	10	Viridiplantae	Embryophyta	[]	[]	33090	3193	0.542857	0.5	10	0	0	0	0	0	0	0	0	0	0	0	0	0	0	0	0	0	0	0	0	0	0	0	0	0	0	0	0	0	0	0	0	0	0	0	0	0	0
filtered out because best identity < 1	only in NTC not in samples	33	Streptophytina	Embryophyta	[]	[]	131221	3193	0.536585	0.5	33	0	0	0	0	0	0	0	0	0	0	0	0	0	0	0	0	0	0	0	0	0	0	0	0	0	0	0	0	0	0	0	0	0	0	0	0	0	0
filtered out because best identity < 1	only in NTC not in samples	22	Embryophyta	Tracheophyta	[]	[]	3193	58023	0.55814	0.488889	22	0	0	0	0	0	0	0	0	0	0	0	0	0	0	0	0	0	0	0	0	0	0	0	0	0	0	0	0	0	0	0	0	0	0	0	0	0	0
filtered out because best identity < 1	only in NTC not in samples	44	Embryophyta	Embryophyta	[]	[]	3193	3193	0.555556	0.488889	44	0	0	0	0	0	0	0	0	0	0	0	0	0	0	0	0	0	0	0	0	0	0	0	0	0	0	0	0	0	0	0	0	0	0	0	0	0	0
filtered out because best identity < 1	only in NTC not in samples	9548	Eukaryota	Eukaryota	[]	[]	2759	2759	0.52	0.46875	9548	0	0	0	0	0	0	0	0	0	0	0	0	0	0	0	0	0	0	0	0	0	0	0	0	0	0	0	0	0	0	0	0	0	0	0	0	0	0
NTC_EH9_trnL_g_h
not filtered out	less than 10 counts in NTC: putative tag jumps	4495000	Saliceae	Saliceae	[]	[]	238069	238069	1	1	4495028	0	291707	190973	121377	88809	142	49	11826	5593	349	10176	0	35812	10763	143840	128632	71618	109701	111383	34778	154314	3057	18579	0	0	6573	79281	153429	262957	29664	74078	121152	114024	328211	21743	0	117071	47994
not filtered out	less than 10 counts in NTC: putative tag jumps	52980	Festuca	Festuca	[]	[Festuca viviparoidea, Festuca kolymensis]	4605	4605	1	1	53000	0	0	0	0	0	0	0	0	0	0	0	0	0	0	0	0	150	462	258	13	191	2301	0	0	0	0	0	0	343	442	0	1299	769	228	40	0	37647	1142
filtered out because best identity < 1	only in NTC not in samples	16	Magnoliophyta	Magnoliophyta	[]	[]	3398	3398	0.614754	0.547009	16	0	0	0	0	0	0	0	0	0	0	0	0	0	0	0	0	0	0	0	0	0	0	0	0	0	0	0	0	0	0	0	0	0	0	0	13	0	0
BLANK.EH122_trnL_g_h												sample.EH111_trnL_g_h	sample.EH112_trnL_g_h	sample.EH113_trnL_g_h	sample.EH114_trnL_g_h	sample.EH115_trnL_g_h	sample.EH116_trnL_g_h	sample.EH117_trnL_g_h	sample.EH118_trnL_g_h	sample.EH119_trnL_g_h	sample.EH120_trnL_g_h	sample.EH121_trnL_g_h	BLANK.EH122_trnL_g_h
filtered out as food / cultivated plant	only in BLANK not in samples	34132	BEP clade	Magnoliophyta	[]	[]	359160	3398	1	0.942308	34133	0	0	0	0	0	0	0	0	0	0	0	34132
filtered out because best identity < 1	only in BLANK not in samples	12	BEP clade	Poaceae	[Oryza sativa, Oryza australiensis, Brachypodium boissieri]	[]	359160	4479	0.961538	0.903846	12	0	0	0	0	0	0	0	0	0	0	0	12
filtered out because best identity < 1	only in BLANK not in samples	16	BEP clade	Poaceae	[]	[]	359160	4479	0.942308	0.884615	16	0	0	0	0	0	0	0	0	0	0	0	16
filtered out because best identity < 1	only in BLANK not in samples	27	Streptophyta	Embryophyta	[]	[]	35493	3193	0.571429	0.548387	27	0	0	0	0	0	0	0	0	0	0	0	27
filtered out because best identity < 1	only in BLANK not in samples	31	Embryophyta	Embryophyta	[]	[]	3193	3193	0.625	0.545455	33	0	0	0	0	0	0	0	0	0	0	0	31
filtered out because best identity < 1	only in BLANK not in samples	652	Huperzia	Embryophyta	[Huperzia varia]	[]	37428	3193	0.857143	0.538462	659	0	0	0	0	0	0	0	0	0	0	0	652
filtered out because best identity < 1	only in BLANK not in samples	3773	Embryophyta	Eukaryota	[]	[]	3193	2759	0.625	0.5	3786	0	0	0	0	0	0	0	0	0	0	0	10
filtered out because best identity < 1	only in BLANK not in samples	14	Streptophyta	Eukaryota	[]	[]	35493	2759	0.571429	0.482759	14	0	0	0	0	0	0	0	0	0	0	0	14
filtered out because best identity < 1	only in BLANK not in samples	35	Embryophyta	Embryophyta	[Huperzia varia]	[]	3193	3193	0.833333	0.461538	35	0	0	0	0	0	0	0	0	0	0	0	35
BLANK.EH134_trnL_g_h																								sample.EH123_trnL_g_h	sample.EH124_trnL_g_h	sample.EH125_trnL_g_h	sample.EH126_trnL_g_h	sample.EH127_trnL_g_h	sample.EH128_trnL_g_h	sample.EH129_trnL_g_h	sample.EH130_trnL_g_h	sample.EH131_trnL_g_h	sample.EH132_trnL_g_h	sample.EH133_trnL_g_h	BLANK.EH134_trnL_g_h
filtered out because best identity < 1	only in BLANK not in samples	13	Huperzia	Embryophyta	[Huperzia varia]	[Equisetum fluviatile, Equisetum pratense, Equisetum palustre, Moerckia hibernica, Equisetum variegatum, Equisetum arvense, Equisetum scirpoides, Equisetum hyemale, Equisetum sylvaticum]	37428	3193	0.857143	0.615385	17													0	0	0	0	0	0	0	0	0	0	0	13
filtered out because best identity < 1	only in BLANK not in samples	319	Streptophyta	Embryophyta	[]	[]	35493	3193	0.551724	0.551724	319													0	0	0	0	0	0	0	0	0	0	0	319
filtered out because best identity < 1	in 1 sample	2792	Huperzia	Eukaryota	[Huperzia varia]	[]	37428	2759	0.857143	0.538462	2798													0	0	0	0	0	0	0	20	0	0	0	875
filtered out because best identity < 1	only in BLANK not in samples	85	Huperzia	Embryophyta	[Huperzia varia]	[]	37428	3193	0.857143	0.538462	90													0	0	0	0	0	0	0	0	0	0	0	85
filtered out because best identity < 1	only in BLANK not in samples	83	Embryophyta	Eukaryota	[]	[]	3193	2759	0.625	0.5	83													0	0	0	0	0	0	0	0	0	0	0	83
filtered out because best identity < 1	only in BLANK not in samples	63	Streptophyta	Eukaryota	[]	[]	35493	2759	0.666667	0.5	64													0	0	0	0	0	0	0	0	0	0	0	17
filtered out because best identity < 1	only in BLANK not in samples	21	Eukaryota	Eukaryota	[]	[]	2759	2759	0.526316	0.5	21													0	0	0	0	0	0	0	0	0	0	0	21
filtered out because best identity < 1	in 2 samples	3773	Embryophyta	Eukaryota	[]	[]	3193	2759	0.625	0.5	3786													0	0	0	0	0	0	0	19	0	12	0	975
filtered out because best identity < 1	only in BLANK not in samples	384	Embryophyta	Embryophyta	[]	[]	3193	3193	0.714286	0.5	384													0	0	0	0	0	0	0	0	0	0	0	384
filtered out because best identity < 1	only in BLANK not in samples	75	Embryophyta	Eukaryota	[Huperzia varia]	[]	3193	2759	0.833333	0.461538	77													0	0	0	0	0	0	0	0	0	0	0	12
filtered out because best identity < 1	only in BLANK not in samples	672	Streptophyta	Embryophyta	[]	[]	35493	3193	0.6	0.461538	672													0	0	0	0	0	0	0	0	0	0	0	672
BLANK.EH146_trnL_g_h																																				sample.EH135_trnL_g_h	sample.EH136_trnL_g_h	sample.EH137_trnL_g_h	sample.EH138_trnL_g_h	sample.EH139_trnL_g_h	sample.EH140_trnL_g_h	sample.EH141_trnL_g_h	sample.EH142_trnL_g_h	sample.EH143_trnL_g_h	sample.EH144_trnL_g_h	sample.EH145_trnL_g_h	BLANK.EH146_trnL_g_h
filtered out as food / cultivated plant	in 1 sample	527	Lactuca sativa	Asteraceae	[Lactuca sativa]	[]	4236	4210	1	0.98	529																									0	360	0	0	0	0	0	0	0	0	0	167
filtered out because best identity < 1	only in BLANK not in samples	31	Streptophyta	Embryophyta	[]	[]	35493	3193	0.642857	0.6	31																									0	0	0	0	0	0	0	0	0	0	0	31
filtered out because best identity < 1	only in BLANK not in samples	16	Magnoliophyta	Magnoliophyta	[]	[]	3398	3398	0.614754	0.547009	16																									0	0	0	0	0	0	0	0	0	0	0	13
filtered out because best identity < 1	only in BLANK not in samples	13	Embryophyta	Eukaryota	[Huperzia varia, Herbertus sendtneri, Nipponolejeunea subalpina, Nipponolejeunea pilifera]	[]	3193	2759	0.583333	0.529412	13																									0	0	0	0	0	0	0	0	0	0	0	13
filtered out because best identity < 1	only in BLANK not in samples	13	Streptophyta	Eukaryota	[]	[]	35493	2759	0.625	0.5	13																									0	0	0	0	0	0	0	0	0	0	0	13
filtered out because best identity < 1	only in BLANK not in samples	14	Embryophyta	Eukaryota	[Huperzia varia]	[]	3193	2759	0.833333	0.5	14																									0	0	0	0	0	0	0	0	0	0	0	14
filtered out because best identity < 1	only in BLANK not in samples	24	Eukaryota	Eukaryota	[]	[]	2759	2759	0.5	0.5	24																									0	0	0	0	0	0	0	0	0	0	0	24
filtered out because best identity < 1	only in BLANK not in samples	49	Eukaryota	Eukaryota	[Tilletiopsis sp. CBS 111593, Ustilago cynodontis, Huperzia funiformis]	[]	2759	2759	0.55	0.5	49																									0	0	0	0	0	0	0	0	0	0	0	49
filtered out because best identity < 1	only in BLANK not in samples	11	Eukaryota	Eukaryota	[]	[]	2759	2759	0.535714	0.481481	11																									0	0	0	0	0	0	0	0	0	0	0	11
BLANK.EH158_trnL_g_h																																																sample.EH147_trnL_g_h	sample.EH148_trnL_g_h
filtered out as food / cultivated plant	in 6 samples	65890	Pooideae	Triticeae	[]	[]	147368	147389	1	1	66015																																					11	139
filtered out as putative contamination	only in BLANK not in samples	191791	Pinus	Pinus	[Pinus resinosa]	[Pinus pumila, Pinus sylvestris]	139271	3337	0.977778	1	191796																																					0	0
filtered out because best identity < 1	only in BLANK not in samples	243	Pinus	Pinus	[Pinus resinosa]	[Pinus pumila, Pinus sylvestris]	139271	3337	0.955556	0.977778	250																																					0	0
filtered out because best identity < 1	only in BLANK not in samples	907	Pinus	Pinus	[Pinus resinosa]	[Pinus pumila, Pinus sylvestris]	139271	3337	0.955556	0.977778	910																																					0	0
filtered out because best identity < 1	only in BLANK not in samples	17965	Pinus resinosa	Pinus	[Pinus resinosa]	[Pinus pumila, Pinus sylvestris]	54921	3337	0.977778	0.977778	17967																																					0	0
filtered out because best identity < 1	only in BLANK not in samples	75	Pinus	Pinus	[Pinus resinosa]	[Pinus pumila, Pinus sylvestris]	139271	3337	0.933333	0.955556	76																																					0	0
filtered out because best identity < 1	only in BLANK not in samples	18	Poeae	Pooideae	[Poa infirma]	[]	147387	147368	0.981132	0.981132	24																																					0	0
filtered out because best identity < 1	only in BLANK not in samples	91	Poeae	Pooideae	[]	[]	147387	147368	0.981132	0.981132	119																																					0	0
filtered out because best identity < 1	only in BLANK not in samples	13	Poeae	Pooideae	[Poa compressa]	[]	147387	147368	0.981132	0.980769	15																																					0	0
filtered out because best identity < 1	only in BLANK not in samples	13	BEP clade	Pooideae	[Phalaris truncata, Elymus repens, Aira praecox, Festuca scariosa]	[]	359160	147368	0.980769	0.980769	15																																					0	0
filtered out because best identity < 1	only in BLANK not in samples	11	BEP clade	Pooideae	[Phalaris truncata, Elymus repens, Aira praecox, Festuca scariosa]	[]	359160	147368	0.980769	0.980769	14																																					0	0
filtered out because best identity < 1	only in BLANK not in samples	12	BEP clade	Pooideae	[Phalaris truncata, Elymus repens, Aira praecox, Festuca scariosa]	[]	359160	147368	0.980769	0.980769	20																																					0	0
filtered out because best identity < 1	only in BLANK not in samples	70	Pooideae	Pooideae	[Aira praecox]	[]	147368	147368	0.981132	0.980769	117																																					0	0
filtered out because best identity < 1	only in BLANK not in samples	13	BEP clade	Pooideae	[Phalaris truncata, Elymus repens, Aira praecox, Festuca scariosa]	[]	359160	147368	0.980769	0.980769	14																																					0	0
filtered out because best identity < 1	only in BLANK not in samples	78	BEP clade	Pooideae	[Phalaris truncata, Elymus repens, Aira praecox, Festuca scariosa]	[]	359160	147368	0.980769	0.980769	79																																					0	0
filtered out because best identity < 1	only in BLANK not in samples	12	BEP clade	Pooideae	[Phalaris truncata, Elymus repens, Aira praecox, Festuca scariosa]	[]	359160	147368	0.980769	0.980769	18																																					0	0
filtered out because best identity < 1	only in BLANK not in samples	13	BEP clade	Pooideae	[Phalaris truncata, Elymus repens, Aira praecox, Festuca scariosa]	[]	359160	147368	0.980769	0.980769	14																																					0	0
filtered out because best identity < 1	only in BLANK not in samples	843	BEP clade	Pooideae	[Phalaris truncata, Elymus repens, Aira praecox]	[]	359160	147368	0.980769	0.980769	843																																					0	0
filtered out because best identity < 1	only in BLANK not in samples	18	BEP clade	Pooideae	[Phalaris truncata, Elymus repens, Aira praecox, Festuca scariosa]	[]	359160	147368	0.980769	0.980769	19																																					0	0
filtered out because best identity < 1	only in BLANK not in samples	60	BEP clade	Pooideae	[Phalaris truncata, Elymus repens, Aira praecox, Festuca scariosa]	[]	359160	147368	0.980769	0.980769	61																																					0	0
filtered out because best identity < 1	only in BLANK not in samples	276	Poaceae	Magnoliophyta	[]	[]	4479	3398	0.961538	0.961538	287																																					0	0
filtered out because best identity < 1	only in BLANK not in samples	28	Poaceae	Magnoliophyta	[]	[]	4479	3398	0.942308	0.942308	28																																					0	0
filtered out as food / cultivated plant	only in BLANK not in samples	61574	Acacia auriculiformis	Magnoliophyta	[Acacia auriculiformis]	[]	205027	3398	1	0.836066	61574																																					0	0
filtered out because best identity < 1	only in BLANK not in samples	14	Mimosoideae	Magnoliophyta	[Acacia auriculiformis]	[]	3807	3398	0.966102	0.803279	14																																					0	0
filtered out because best identity < 1	only in BLANK not in samples	81	Spermatophyta	Spermatophyta	[]	[]	58024	58024	0.608696	0.583333	81																																					0	0
filtered out because best identity < 1	only in BLANK not in samples	17	Eukaryota	Spermatophyta	[]	[]	2759	58024	0.576923	0.559322	17																																					0	0
filtered out because best identity < 1	only in BLANK not in samples	23	Euphyllophyta	Euphyllophyta	[]	[]	78536	78536	0.583333	0.555556	23																																					0	0
filtered out because best identity < 1	only in BLANK not in samples	51	Euphyllophyta	Spermatophyta	[]	[]	78536	58024	0.568627	0.55	51																																					0	0
filtered out because best identity < 1	only in BLANK not in samples	15	Embryophyta	Euphyllophyta	[]	[]	3193	78536	0.571429	0.545455	15																																					0	0
filtered out because best identity < 1	only in BLANK not in samples	19	Streptophyta	Spermatophyta	[]	[]	35493	58024	0.571429	0.540984	19																																					0	0
filtered out because best identity < 1	only in BLANK not in samples	13	Euphyllophyta	Spermatophyta	[]	[]	78536	58024	0.568627	0.540984	13																																					0	0
filtered out because best identity < 1	only in BLANK not in samples	25	Euphyllophyta	Spermatophyta	[]	[]	78536	58024	0.568627	0.540984	25																																					0	0
filtered out because best identity < 1	only in BLANK not in samples	122	Embryophyta	Euphyllophyta	[]	[]	3193	78536	0.561404	0.535714	122																																					0	0
filtered out because best identity < 1	only in BLANK not in samples	10	Euphyllophyta	Spermatophyta	[]	[]	78536	58024	0.557692	0.532258	10																																					0	0
filtered out because best identity < 1	only in BLANK not in samples	70498	Viridiplantae	Eukaryota	[]	[]	33090	2759	0.541667	0.454545	70498																																					0	0
BLANK.EH169_trnL_g_h
	clean
[truncated: 30 more columns]
